# Supplementary material for: UPAYA KONSERVASI SUMBER DAYA AIR SEBAGAIPELESTARIAN SUMBER AIR TANAH DI HULUSUB DAS KALI OPAK, KECAMATAN CANGKRINGAN,KABUPATEN SLEMAN,PROVINSI DERAH ISTIMEWA YOGYAKARTA
Source: MDPI journal article supplement (doi:10.3390/toxics12020124), 2013-01-01
Supplement: s1 [file s1]

**Supplementary file 1.** Tabular presentation for QUADAS-2 results (😊 Low Risk 😞 High Risk ? Unclear Risk).

| Study                  | RISK OF BIAS      |            |                    |                 | APPLICABILITY CONCERNS |            |                    |
|------------------------|-------------------|------------|--------------------|-----------------|------------------------|------------|--------------------|
|                        | PATIENT SELECTION | INDEX TEST | REFERENCE STANDARD | FLOW AND TIMING | PATIENT SELECTION      | INDEX TEST | REFERENCE STANDARD |
| Barranco et al. [26],  | 😊                 | ?          | ?                  | 😊               | 😊                      | 😊          | 😊                  |
| Bugelli et al. [24],   | 😊                 | ?          | ?                  | 😊               | 😊                      | 😊          | 😊                  |
| Cvetkovic et al. [31], | 😊                 | ?          | ?                  | 😊               | 😊                      | 😊          | 😊                  |
| Dean et al.[15],       | 😊                 | ?          | ?                  | 😊               | 😊                      | 😊          | 😊                  |
| Durão et al. [16],     | 😊                 | ?          | ?                  | 😊               | 😊                      | 😊          | 😊                  |
| Durão et al. [30],     | 😊                 | ?          | ?                  | 😊               | 😊                      | 😊          | 😊                  |
| Hickey et al. [27],    | 😊                 | ?          | ?                  | 😊               | 😊                      | 😊          | 😊                  |
| Hwang et al.[17],      | 😊                 | ?          | ?                  | 😊               | 😊                      | 😊          | 😊                  |
| Stephenson et al.[25], | 😊                 | ?          | ?                  | 😊               | 😊                      | 😊          | 😊                  |
| Taus et al.[28],       | 😊                 | ?          | ?                  | 😊               | 😊                      | 😊          | 😊                  |
| Tomsia et al.[29],     | 😊                 | ?          | ?                  | 😊               | 😊                      | 😊          | 😊                  |
